# Supplementary material for: Safety of a killed oral cholera vaccine (Shanchol) in pregnant women in Malawi: an observational cohort study
Source: PubMed Central journal article supplement (PMC5406486; doi:10.1016/s1473-3099(16)30523-0), 2017-05
Supplement: mmc1.pdf [file mmc1.pdf]

# THE LANCET

## Infectious Diseases

### Supplementary appendix

This appendix formed part of the original submission and has been peer reviewed.  
We post it as supplied by the authors.

Supplement to: Ali M, Nelson A, Luquero FJ, et al. Safety of a killed oral cholera vaccine (Shanchol) in pregnant women in Malawi: an observational cohort study. *Lancet Infect Dis* 2017; published online Feb 1. [http://dx.doi.org/10.1016/S1473-3099\(16\)30523-0](http://dx.doi.org/10.1016/S1473-3099(16)30523-0).

**Table S1. Baseline characteristics between women exposed and not exposed to OCV and who were loss to follow-up**

| <b>Baseline characteristics</b>                                                   | <b>Exposed to OCV<br/>(n=65)</b> | <b>Not exposed<br/>to OCV (n=64)</b> | <b>P-value*</b> |
|-----------------------------------------------------------------------------------|----------------------------------|--------------------------------------|-----------------|
| At least primary schooling                                                        | 22 (33.85)                       | 22 (34.38)                           | 0.95            |
| Electricity in the house                                                          | 3 (4.62)                         | 4 (6.25)                             | 0.68            |
| Owns house                                                                        | 55 (84.62)                       | 52 (81.25)                           | 0.61            |
| Drank coffee/tea during pregnancy                                                 | 0 (0.00)                         | 0 (0.00)                             | -               |
| Drank alcohol during pregnancy                                                    | 0 (0.00)                         | 0 (0.00)                             | -               |
| Took illegal drugs during pregnancy                                               | 0 (0.00)                         | 0 (0.00)                             | -               |
| Smoked cigarettes during pregnancy                                                | 0 (0.00)                         | 0 (0.00)                             | -               |
| Had past history of pregnancy loss                                                | 15 (23.08)                       | 9 (14.06)                            | 0.19            |
| Average age of the women                                                          | 27.15 (7.26)                     | 24.56 (6.69)                         | 0.04            |
| Average distance (linear) from household to the nearest health care facility (km) | 3.94 (3.65)                      | 5.28 (2.89)                          | 0.02            |
| Average gestational age at enrollment (weeks)                                     | 27.64 (7.46)                     | 26.84 (6.15)                         | 0.51            |
| Average gestational age at the start of vaccination (March 30, 2015) (weeks)      | 12.81 (7.48)                     | 12.38 (5.99)                         | 0.72            |

\* The p-values were derived from chi-square test for the categorical variables and from t-test for the dimensional variables

Table S2. Risk factors for pregnancy loss in a multivariable model

| Variables                                                   | Relative risk | 95% CI       | P-value |
|-------------------------------------------------------------|---------------|--------------|---------|
| Exposed to OCV                                              | 1.245         | 0.638-2.429  | 0.5205  |
| Drank coffee/tea during pregnancy                           | 0.652         | 0.340-1.247  | 0.1957  |
| Took illegal drugs during pregnancy                         | 1.740         | 0.227-13.347 | 0.5940  |
| Distance from household to the nearest health care facility | 1.051         | 0.972-1.136  | 0.2131  |
